# Supplementary material
Source: Springer Nature journal article supplement (https://www.springermedizin.de/resource/supplementary/12967_2013_1855_MOESM5_ESM.pdf/9574928)

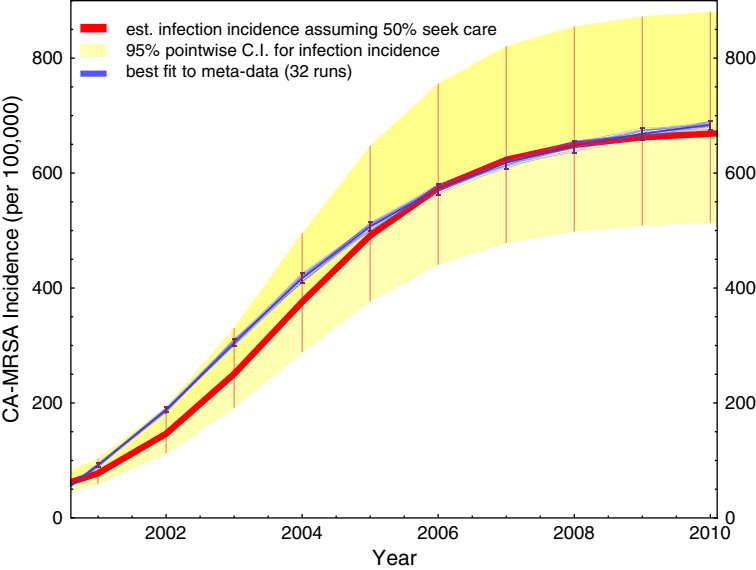

Supplement: MOESM5 [file 9574928]
